1 **Host circadian clocks do not set the schedule for the within-host replication of malaria parasites**

2 Aidan J. O'Donnell<sup>§1</sup>, Kimberley F. Prior<sup>1</sup>, & Sarah E. Reece<sup>1</sup>

3

4 <sup>1</sup> Institute of Evolutionary Biology, and Institute of Immunology and Infection Research, School of  
5 Biological Sciences, University of Edinburgh, Edinburgh, UK

6

7 <sup>§</sup>Corresponding author:

8 Aidan O'Donnell

9 [Aidan.ODonnell@ed.ac.uk](mailto:Aidan.ODonnell@ed.ac.uk)

10

11 Running title: Malaria rhythms run free of host clocks

12

13

## 14 SUMMARY

15 Circadian clocks coordinate organisms' activities with daily cycles in their environment. Parasites are  
16 subject to daily rhythms in the within-host environment, resulting from clock-control of host behaviours  
17 and physiologies, including immune responses. Parasites also exhibit rhythms in within-host activities;  
18 the timing of host feeding sets the timing of the within-host replication of malaria parasites. Why host  
19 feeding matters to parasites and how coordination with feeding is achieved are unknown. Determining  
20 whether parasites coordinate with clock-driven food-related rhythms of their hosts matters because  
21 rhythmic replication underpins disease symptoms and fuels transmission.

22 We find that parasite rhythms became coordinated with the time of day that hosts feed in both wild  
23 type and clock-mutant mice, whereas parasite rhythmicity was lost in clock-mutant mice that fed  
24 continuously. These patterns occurred regardless of whether infections were initiated with synchronous  
25 or with desynchronised parasites.

26 Malaria parasite rhythms are not driven by canonical clock-controlled host rhythms. Instead, we  
27 propose parasites coordinate with a temporally-restricted nutrient that becomes available through host  
28 digestion or are influenced by a separate clock-independent host process that directly responds to  
29 feeding. Thus, interventions could disrupt parasite rhythms to reduce their fitness, without interference  
30 by host clock-controlled-homeostasis.

31

32

33

34 **Keywords:** *Plasmodium*, TTFL, intraerythrocytic development cycle, periodicity, circadian rhythm, clock  
35 mutant

## 36 INTRODUCTION:

37 Biological rhythms are ubiquitous and allow organisms to maximise fitness by synchronising behaviours,  
38 physiologies, and cellular processes with periodicity in their environment. The value of coordinating with  
39 daily cycles in, for example, light/dark and temperature in the abiotic environment has long been  
40 appreciated, and the importance for parasites of coordinating with rhythms experienced inside hosts  
41 and vectors (i.e. the biotic environment), is gaining increasing recognition [1-3]. For example, circadian  
42 rhythms in virulence enables the fungal pathogen *Botrytis cinerea* to cope with rhythmic immune  
43 defences in plant hosts [4, 5], circadian control of macrophage migration provides incoming *Leishmania*  
44 *major* parasites with more host cells to invade at dusk than dawn [6], and host clocks control the ability  
45 of herpes and hepatitis viruses to invade cells and to replicate within them [7, 8]. Parasites that possess  
46 their own circadian clocks, such as the fungus *B. cinerea* and protozoan *Trypanosoma brucei* (which  
47 causes sleeping sickness), can use their clocks to coordinate with host rhythms [4, 9]. However, it is  
48 unclear how coordination with host rhythms is achieved by parasites that are not known to have  
49 circadian clocks. For example, malaria (*Plasmodium*) parasites exhibit periodicity in their development  
50 during their cycles of asexual replication in red blood cells (the intra-erythrocytic development cycle;  
51 IDC). The IDC lasts 24 hours (or multiples of 24 hours, depending on the parasite species) and is  
52 characterised by progression through distinct developmental stages at particular times-of-day. For  
53 example, the timing of *P. chabaudi*'s IDC transitions are determined by the time-of-day that murine  
54 hosts are provided with food [10, 11]. Specifically, parasites remain in early IDC stages when hosts are  
55 fasting and complete the IDC at the end of the feeding phase. Why malaria parasites exhibit this  
56 schedule is unclear, but coordination with host rhythms and with vector rhythms confers fitness benefits  
57 to parasites [12-16].

58 Explaining how and why malaria parasites complete their IDC according to a schedule is important  
59 because cycles of asexual replication are responsible for the severity of malaria symptoms and fuels the

60 production of transmission forms. Furthermore, reports that several mosquito populations are shifting  
61 the timing of their blood foraging behaviour to evade insecticide-treated bed nets [17-19], suggest the  
62 interaction between parasite and vector rhythms could have complex consequences for disease  
63 transmission. Moreover, a mechanistic insight into how the IDC is scheduled may offer insight into  
64 developing novel interventions to disrupt parasite replication. Indeed, many antimalarial drugs have  
65 increased efficacy towards specific IDC stages [20] and parasites may utilize IDC stage specific dormancy  
66 to facilitate survival during antimalarial drug treatment [21]. The extent to which hosts enforce a  
67 schedule upon the IDC and to which parasites possess an ability to organise their own IDC with respect  
68 to time-of-day cue(s) are open questions [22]. For example, it has been suggested that the IDC schedule  
69 is entirely explained by circadian host immune responses killing certain IDC stages at certain times of  
70 day [23] or by only allowing access to a nutrient essential to a particular IDC stage at a certain time-of-  
71 day [24]. Alternatively, parasites may be able to, at least in part, schedule their IDC to avoid coinciding a  
72 vulnerable IDC stage with a dangerous time-of-day, or to maximally exploit a time-limited resource [3]. A  
73 foundation for explaining both why the IDC schedule benefits parasites and how it is controlled, requires  
74 discovering which of the myriad of host rhythms associated with the time-of-day of feeding are  
75 responsible for the IDC schedule.

76 Here, we use the rodent malaria parasite *P. chabaudi* to test whether the relevant host feeding-  
77 associated rhythm is driven by, or independent of, the host's canonical circadian clock. The canonical  
78 mammalian circadian clock operates via a core Transcriptional Translational Feedback Loop (TTFL)  
79 involving dimeric proteins that promote the expression of other clock proteins as well as the inhibition  
80 of themselves [25]. The feedback and degradation of these proteins forms an oscillator that is entrained  
81 via external daily stimuli (Zeitgeber, usually light) to keep the clock precisely tuned to environmental  
82 periodicity. TTFL clock-controlled processes include many metabolic pathways relevant to IDC  
83 progression. For example, CLOCK and BMAL1 regulate blood glucose levels [26, 27], and melatonin

84 release (which has been suggested to speed up IDC progression [28]). Alternatively, the IDC schedule  
85 could simply be driven by the appearance of nutrients/metabolites made available in the blood as a  
86 direct consequence of food digestion (i.e. via processes not reliant on clocks). Host-clock-controlled or  
87 clock-independent products of digestion could: (i) impact directly on IDC progression by providing  
88 essential resources for different IDC stages at different times of day, and/or (ii) provide time-of-day  
89 information to the parasite to modulate its rate of development to maximise acquisition of such  
90 resources, or (iii) act as a proxy for another important rhythmic factor that the parasite must coordinate  
91 with.

92 We apply time restricted feeding (TRF) protocols to wild type and clock disrupted *Per1-Per2* double  
93 knockout mice (*Per1/2*-null) and compare the consequences for the IDC of *P. chabaudi* infections  
94 initiated with either synchronous or desynchronised parasites. We hypothesise that if a feeding rhythm  
95 alone is sufficient to generate an IDC schedule, IDC completion will coincide with feeding in both wild  
96 type and *Per1/2*-null TRF mice, and that parasites become (or remain) desynchronised in *Per1/2*-null  
97 mice allowed to forage throughout the circadian cycle. In contrast, if feeding rhythms impact on the IDC  
98 via host clock-controlled processes, parasites will only be synchronous in wild type mice, regardless of  
99 whether initiated with synchronous or desynchronised parasites. In addition to examining the impact of  
100 the host clock on the IDC, we also test whether infection of clock-disrupted mice has fitness  
101 consequences for both parasites and hosts. The mammalian clock controls many aspects of immunity  
102 [29], including the ability of leukocytes to migrate to the tissues [30] and the ability of macrophages to  
103 release cytokines [31], and rodents without functioning *Per2* lack IFN- $\gamma$  mRNA cycling in the spleen (a  
104 key organ for malaria parasite clearance) and have decreased levels of pro-inflammatory cytokines in  
105 blood serum [32]. Thus, we predicted that parasites will achieve higher densities, and hosts experience  
106 more severe disease, in *Per1/2*-null compared to wild type mice.

107

108 **METHODOLOGY:**

109 To investigate whether a functional TTLF circadian clock is required for the IDC of malaria parasites to  
110 follow a schedule we performed two experiments. First, we initiated infections with desynchronised  
111 parasites to test whether a feeding rhythm alone is sufficient to restore synchrony and timing in the IDC  
112 (Figure 1a). Second, we tested whether the loss of rhythmic feeding causes desynchronization in the IDC  
113 of infections initiated with synchronized parasites (Figure 1b).

114

115 *Parasites and hosts*

116 Hosts were either wild type (WT) C57BL/6J strain or *Per1/2*-null clock-disrupted mice previously  
117 backcrossed onto a C57BL/6J background for over 10 generations. *Per1/2*-null mice (kindly donated by  
118 Michael Hastings (MRC Laboratory of Molecular Biology, Cambridge, UK), generated by David Weaver  
119 (UMass Medical School, Massachusetts, USA)) have an impaired TTFL clock and exhibit no circadian  
120 rhythms in physiology and behavior. For example, they exhibit arrhythmic locomotor activity when  
121 placed in constant conditions such as constant darkness [33, 34]. All experimental WT and *Per1/2*-null  
122 mice were 8-10 weeks old and housed at 21°C in DD (continuous darkness) with constant dim red LED  
123 light for the duration of the experiments. Note, donor mice were housed in light-dark cycle conditions to  
124 generate synchronous parasites for the initiation of experimental infections. All mice were acclimatized  
125 to their feeding treatments (see below) and to DD conditions for 3 weeks before and throughout  
126 infections. As the free running period (the time taken to complete one cycle of an endogenous rhythm in  
127 the absence of environmental time cues) of our mice is very close to 24hours (23.8-23.9h, electronic  
128 supplementary material (ESM)) when placed in DD these mice will exhibit a schedule similar to the initial  
129 LD conditions they were raised in. Therefore, we define subjective day (rest phase) for wild type mice as  
130 07:00-19:00 GMT and subjective night (active phase) as 19:00-07:00 GMT. All mice were provided with

131 unrestricted access to drinking water supplemented with 0.05 % para-aminobenzoic acid (to supplement  
132 parasite growth). All mice were housed individually to avoid any influence of conspecific cage-mates on  
133 their rhythms. On Day 0, each mouse was infected with  $5 \times 10^6$  *P. chabaudi* (clone DK) parasitized red  
134 blood cells administered via intravenous injection. All procedures were carried out in accordance with  
135 the UK Animals (Scientific Procedures) Act 1986 (PPL 70/8546).

136

### 137 *Experimental designs*

#### 138 *Experiment 1 – does a host feeding rhythm restore the IDC schedule of desynchronised parasites?*

139 Wild type WT mice and *Per1/2*-null (n=5 per group) mice were fed on either a time restricted feeding  
140 schedule (TRF; fed for 10hours per day) or had access to food *ad libitum* (*ad lib*). This generated 4  
141 treatment groups with the following characteristics (Figure 1a): (i) WT *ad lib* mice with 24h access to  
142 food that followed their normal free-running rhythms and primarily fed in their subjective night (19:00-  
143 07:00 GMT); (ii) WT TRF mice fed during subjective day (09:00-19:00 GMT) experienced temporal  
144 misalignment between rhythms controlled by the suprachiasmatic nucleus (SCN; which free-runs at a  
145 timing close to their previous entrainment to LD conditions) and peripheral rhythms, which are driven by  
146 feeding [11]; (iii) *Per1/2*-null *ad lib* mice that had continuous access to food and were arrhythmic (ESM)  
147 and (iv) *Per1/2*-null TRF mice fed during subjective day that only experienced rhythms resulting from a  
148 set daily period for feeding. Infections in all mice were initiated with a population of desynchronised  
149 parasites at 08:30 GMT. The inoculum was a 50:50 mix of parasites 12 hours apart in the IDC.  
150 Specifically, ring stages (donated from donors in a 12:12 light:dark cycle (LD)) and late trophozoite  
151 stages (donated from dark:light (DL) donors)(Figure 1a).

#### 152 *Experiment 2 – do parasites lose IDC synchrony in the absence of a host feeding rhythm?*

153 We generated 3 groups of n=5 mice (Figure 1b): (i) WT TRF mice fed during subjective day; (ii) *Per1/2*-  
154 null TRF mice fed during subjective day; and (iii) *Per1/2*-null *ad lib* food. Infections in all mice were  
155 initiated with a population of synchronous ring stage parasites collected at 08:30 GMT from a single  
156 donor in a 12:12 light:dark cycle (LD). This meant the parasites entered experimental hosts early in the  
157 feeding period, which is 12 hours out of phase to when rings stages peak in control infections (Figure  
158 1b). Generating a mismatch between incoming parasites and the hosts feeding rhythm tests whether  
159 the IDC becomes rescheduled to match the feeding rhythm in the TRF groups, avoiding an outcome of  
160 the IDC being unable to change obscuring the interpretation of results, following Prior et al 2018 [11].

161

#### 162 *Sampling & data collection*

163 All experimental mice were sampled at 4-hourly intervals for 32 hours beginning at 08:00 (GMT) Day 5  
164 to 16:00 Day 6 post infection (pi). Previous work [11] revealed that synchronous parasites in infections  
165 mismatched to the host's feeding rhythm by 12 hours exhibit a rescheduled IDC within four days, and  
166 this is verified by the rescheduling of the IDC in the WT TRF mice fed during subjective day in experiment  
167 2 (Figure 2a; Figure 3a). At each sampling point, blood was collected from the tail vein and parasites at  
168 each IDC stage quantified from thin blood smears. Stages were characterised by morphology, based on  
169 parasite size, the size and number of nuclei and the appearance of haemozoin (as per [11] and [2]). Red  
170 blood cell (RBC) densities were measured at each sampling time by flow cytometry (Z2 Coulter Counter,  
171 Beckman Coulter). Mouse weights were measured on Day 2 PI and Day 6 PI at 16:00 GMT. All  
172 procedures were carried out in dim red LED light. Before infection, we verified that locomotor activity  
173 (movement around the cage) and internal body temperature of WT mice followed the free-running  
174 rhythms expected in DD given their previous entrainment to LD, and whether locomotor activity can be  
175 used as a good proxy for feeding events (ESM).



176

177 *Statistical Analysis*

178 Time of onset of locomotor activity and overall period estimates for locomotor activity and body  
179 temperature data were calculated using Clocklab (Actimetrics). Harmonic regression (periodicity  
180 analysis) was performed on parasite data using Circwave (v. 1.4, courtesy of R. Hut;  
181 <http://www.euclock.org>). All other statistical analyses were carried out using R version 3.5.0.  
182 Correlations between feeding events and locomotor activity was tested using a generalised linear model  
183 with a zero-inflated poisson regression (package pscl). Output model fit measures for amplitude and  
184 phase, as well disease severity (red blood cell loss) and parasite performance (maximum parasite  
185 density) measures, were compared between groups using general linear models and models were  
186 confirmed for best fit by comparing AICC values. All models met model assumptions: independence of  
187 data points, normality of residuals and homogeneity of variances (confirmed through assessing the  
188 model plots, the Shapiro–Wilk test and Bartlett’s test). Whilst some variation in parasite density was  
189 observed across treatment groups, any underlying differences in replication rate are not large enough to  
190 introduce biases associated with estimating synchrony from IDC stage proportion data [35]. Mean effect  
191 sizes were calculated using bootstrapped coupled estimation (package dabestr). Measures of red blood  
192 cell loss were calculated by taking the maximum RBC value across the time series and subtracting the  
193 minimum RBC value. This minimised any issues associated with comparing data for the same GMT  
194 across groups in which host and parasite rhythms may be phased differently. For measures of circadian  
195 phase, Bayesian circular GLM’s (selected using DIC) were used (package circglmbayes), which allows  
196 regressing a circular outcome on linear and categorical predictors.

197

198

199 **RESULTS:**

200 ***Assumptions of the experimental designs***

201 We first verified that only WT mice exhibit rhythms in locomotor activity and body temperature and  
202 confirmed arrhythmic activity of *Per1/2*-null *ad lib* mice (ESM). Second, we reveal that locomotor activity  
203 can be used as a proxy for feeding rhythms in *Per1/2*-null TRF mice (ESM).

204

205 ***Experiment 1 – does a host feeding rhythm restore the IDC schedule of desynchronised parasites?***

206 We compared IDC rhythms in terms of synchronicity (amplitude) and timing (phase) of the proportion of  
207 parasites at ring stage (a morphologically distinct ‘marker’ stage after which all other parasite stages  
208 follow in a predictable manner)[11]. By day 5-6 post infection, the IDC of parasites in all WT mice and  
209 *Per1/2*-null TRF mice had become scheduled to coincide with host feeding rhythms (Figure 2a).

210 Amplitude differed significantly between groups (Figure 2b; genotype:feeding\_regime:  $\chi^2_{15} = 0.43$ ,  $p <$   
211  $0.001$ ). Specifically, parasites in *Per1/2*-null TRF mice had the highest amplitudes (mean  $\pm$ SEM:  $0.85 \pm$   
212  $0.08$ ) followed by wild type *ad lib* infections ( $0.75 \pm 0.03$ ), and then wild type TRF infections ( $0.59 \pm$   
213  $0.07$ ), with *Per1/2*-null *ad lib* infections ( $0.41 \pm 0.09$ ) exhibiting approximately half the amplitude of

214 parasites in hosts with feeding rhythms. We also found differences in the timing of peak proportion ring  
215 stages between groups explained by a host genotype:feeding\_regime interaction (Figure 2c; ESM Table  
216 S1). Rings in WT mice peaked at the end of their hosts subjective feeding regime (circular mean  $\pm$ SD

217 (hours GMT): WT *ad lib* =  $7.06 \pm 0.35$ ) while parasites in TRF mice peaked within 1-2 hours of end of their  
218 restricted feeding regime (WT TRF =  $23.32 \pm 0.27$ , *Per1/2*-null TRF =  $20.96 \pm 0.61$ ). Parasites in *ad lib* fed  
219 *Per1/2*-null mice peaked at  $19.47 (\pm 0.83)$ . See ESM Table S2 for a summary of bootstrapped mean effect

220 sizes.

221 We also assessed whether anaemia and parasite performance varies according between WT and *Per1/2*-  
222 null mice. Neither host genotype, feeding regime or their interaction significantly affected RBC loss  
223 (genotype:feeding\_regime:  $\chi^2_{16} = 1.82 \times 10^{17}$ ,  $p = 0.60$ ; host genotype:  $\chi^2_{17} = 1.06 \times 10^{17}$ ,  $p = 0.69$ ; feeding  
224 regime:  $\chi^2_{18} = 1.27 \times 10^{18}$ ,  $p = 0.15$ ), with hosts losing an average of  $2.50 \pm 0.18 \text{ SEM} \times 10^9 \text{ ml}^{-1}$  RBCs during  
225 the sampling period (ESM Figure 3a; ESM Table S2). In contrast, host genotype had a significant effect  
226 on maximum parasite density ( $\chi^2_{17} = 1.15 \times 10^{18}$ ,  $p = 0.002$ ) in which parasites infecting WT hosts  
227 achieved maximum densities  $\sim 40\%$  higher than those parasites infecting *Per1/2*-null mice (mean  $\pm \text{SEM} \times$   
228  $10^9 \text{ ml}^{-1}$ : WT =  $1.69 \pm 0.08$ , *Per1/2*-null =  $1.22 \pm 0.10$ ; ESM Figure 3b; ESM Table S2). Neither feeding  
229 regime ( $\chi^2_{17} = 2.16 \times 10^{16}$ ,  $p = 0.63$ ) nor its interaction with host genotype ( $\chi^2_{16} = 3.42 \times 10^{16}$ ,  $p = 0.55$ ) had  
230 an effect on maximum parasite density.

231

### 232 **Experiment 2 – do parasites lose IDC synchrony in the absence of a host feeding rhythm?**

233 By day 5-6 post infection, the IDC of parasites in all TRF fed mice had rescheduled to coincide with host  
234 feeding rhythms (Figure 3a). Amplitude differed significantly between host feeding regimes (Figure 3b;  
235  $\chi^2_9 = 0.66$ ,  $p < 0.001$ ). Parasites in TRF mice exhibited high amplitudes (mean  $\pm \text{SEM}$ : WT TRF =  $0.96 \pm$   
236  $0.04$ , *Per1/2*-null TRF =  $0.90 \pm 0.02$ ) whereas amplitudes for parasites in *Per1/2*-null *ad lib* mice were  
237 more than 50% lower ( $0.39 \pm 0.02$ ). These differences were not influenced by host genotype ( $\chi^2_9 = 0.01$ ,  
238  $p = 0.11$ ). In addition, we found differences in IDC timing that are explained by host feeding regime  
239 (Figure 3c; ESM Table S1). Parasites in TRF mice peaked 4 hours after their host's feeding period (circular  
240 mean  $\pm \text{SD}$  (hours GMT); WT TRF =  $22.92 \pm 0.22$ , *Per1/2*-null TRF =  $23.01 \pm 0.22$ ) whereas parasites in  
241 *Per1/2*-null *ad lib* mice peaked 8 hours earlier than TRF groups ( $17.66 \pm 0.24$ ). Again, host genotype did  
242 not explain these differences (ESM Table S1). See ESM Table S2 for a summary of bootstrapped mean  
243 effect sizes.

244 Red blood cell loss was influenced by both host genotype ( $\chi^2_{11} = 4.17 \times 10^{18}$ ,  $p < 0.001$ ) and host feeding  
245 regime ( $\chi^2_{11} = 4.56 \times 10^{17}$ ,  $p = 0.025$ ; ESM Figure 4a; ESM Table S2). Specifically, WT TRF lost the most  
246 RBC (30-57% more than both groups of *Per1/2*-null mice), and *ad lib* fed *Per1/2*-null mice lost 20% more  
247 RBC's than their *Per1/2*-null TRF counterparts (mean  $\pm$ SEM  $\times 10^9 \text{ml}^{-1}$ : WT TRF =  $3.57 \pm 0.13$ , *Per1/2*-null  
248 TRF =  $2.28 \pm 0.15$ , *Per1/2*-null *ad lib* =  $2.73 \pm 0.13$ ). Host genotype alone also had an effect on maximum  
249 parasite density (genotype:  $\chi^2_2 = 4.51 \times 10^{17}$ ,  $p = 0.002$ ; feeding regime:  $\chi^2_{11} = 9.36 \times 10^{14}$ ,  $p = 0.89$ ) with  
250 parasites in WT TRF hosts achieving maximum parasites densities 24% higher than parasites in *Per1/2*-  
251 null mice (mean  $\pm$ SEM  $\times 10^9 \text{ml}^{-1}$ : WT TRF =  $1.89 \pm 0.11$ , *Per1/2*-null =  $1.51 \pm 0.07$ ; ESM Figure 4b; ESM  
252 Table S2).

253

254

## 255 **DISCUSSION:**

256 Our results demonstrate that timing and synchrony of the IDC of the malaria parasite *P. chabaudi* is not  
257 dependent on rhythms driven by the canonical "TTFL" circadian clock of hosts, and that feeding rhythms  
258 alone establish the IDC schedule. The first experiment revealed that infections in wild type hosts  
259 initiated with desynchronised parasites became synchronized and that the timing of IDC transitions  
260 became coordinated with the timing of feeding (ring stages peaking 2-4 hours after food intake ends),  
261 consistent with Prior *et al* [11]. Strong IDC rhythms also emerged in hosts that do not possess a  
262 functioning TTFL clock but do have enforced feeding rhythm with very similar timing (reaching an  
263 average peak ring stage proportion of 86% within an hour after the feeding period ends). Furthermore,  
264 in *ad lib* fed clock-disrupted hosts, which feed in many small irregular bouts across each 24hrs, the IDC  
265 remained desynchronised (ring stage proportion remaining at around 50% across all sampling points).  
266 Consistent with these phenomena, our second experiment revealed that infections initiated with

267 synchronous parasites remained synchronous and became coordinated to the timing of host feeding in  
268 both wild type and clock disrupted mice with feeding rhythms. Whereas in *ad lib* fed clock-disrupted  
269 mice, the IDC rhythm became dampened (peak in ring stages dropping from 100% to 75%). Put another  
270 way, we show that an IDC schedule emerges in hosts with a feeding rhythm independently of whether  
271 they have a TTFL clock, and the IDC schedule is lost in hosts without a feeding rhythm. Whilst the IDC  
272 rhythm of synchronous infections of *ad lib* fed clock-disrupted mice became dampened, it did not  
273 become fully desynchronised. There are two non-mutually exclusive reasons for this. First, there are  
274 likely to be development constraints acting on the duration of each IDC stage and the overall IDC length.  
275 If the minimum and maximum duration of the IDC is close to 24 hours, or stage durations similarly  
276 constrained, natural variation in duration will take more cycles to erode synchrony than in our  
277 experiment. Second, even in completely asynchronous infections, the expansion of parasite number due  
278 to each asexual stage replacing itself with multiple progeny, can generate the illusion of strong  
279 synchrony [35].

280

281 Why should host feeding rhythms set the schedule for the IDC? Blood glucose concentration follows a  
282 daily rhythm and has been implicated as the specific factor responsible for the timing of the IDC  
283 schedule. Glucose tolerance oscillates across the day in a circadian manner and behavioural factors,  
284 such as activity, feeding and fasting, strongly affect glucose metabolism. This makes it difficult to  
285 quantify the independent effect of the circadian system on the 24h diurnal variations in glucose  
286 concentration [36]. Glucose regulation is a tightly controlled process, achieved via the antagonistic  
287 effects of the hormones insulin and glucagon, and involves the contribution of several different organs  
288 (liver, pancreas) to dampen perturbations due to feeding and fasting. Malaria infection disrupts this  
289 balance by exacerbating the drop in blood glucose concentration at the end of the active phase [10].  
290 Perhaps this drop, or the rapid rise in blood glucose concentration at the start of the feeding period,

291 could either signal time-of-day to parasites and/or enforce a schedule in which only the most glucose  
292 demanding IDC stages (late trophozoites and schizonts) can develop during the feeding period.  
293 However, other resources required by later IDC stages, including amino acids essential for protein  
294 synthesis [37], purines (in particular hypoxanthine) for nucleic acid synthesis, and  
295 lysophosphatidylcholine (lysoPC) for various processes such as cell membrane production [38], are also  
296 likely derived by the parasite from the host's food. Feeding-driven rhythms in these factors (in addition  
297 to/instead of blood glucose concentration) may ultimately drive the IDC schedule. Because glucose –  
298 and other metabolites derived from food – are generally elevated throughout the feeding period, which  
299 is a significant proportion of the circadian cycle, late IDC stage parasites have a long window in which  
300 they can develop. Given that the timing of the IDC schedule appears more precise than simply IDC  
301 completion occurring at some point during the feeding period, we suspect malaria parasites are, at least  
302 in part, capable of organizing the IDC schedule themselves to orient it to the timing of incoming  
303 resources.

304

305 Whilst our results strongly implicate food rhythms as responsible for the IDC schedule, other rhythms  
306 remain as possibilities. First, circadian rhythms independent of the TFL could operate in clock-disrupted  
307 mice and schedule the IDC. For example, lipid levels in hepatic cells maintain oscillations in clock-  
308 disrupted mice (specifically *Bmal1* knockouts) albeit in a different phase to wild type mice [39], and  
309 under specific experimental conditions, food anticipatory activity can be observed in other clock-  
310 disrupted mice [40]. The mechanisms of these rhythms are not fully understood but daily oxidation-  
311 reduction rhythms exist (which occur within mammalian RBCs [41] and are evolutionarily conserved  
312 [42]) and may be linked to cellular flux in magnesium ions [43]. Whether such rhythms are reliable time-  
313 cues during infection or if they can be entrained by the timing of feeding are unknown. Second, in small  
314 mammals, body temperature rhythms are influenced by a combination of the circadian clock,

315 metabolism, and locomotor activity. Temperature rhythms can entrain host cells (including RBCs) and  
316 other parasites (e.g. *Trypanosoma brucei*) [9], and malaria parasites do respond to temperature change  
317 (e.g. when taken up by ectothermic mosquitoes) [44, 45]. However, it is unlikely that the IDC schedule is  
318 set by a temperature rhythm. Prior *et al* (2018) reveal inverted IDC rhythms in day- and night-fed mice  
319 but host temperature rhythms are not inverted. Similarly, both the *ad lib* fed and TRF fed wild type hosts  
320 in the experiments presented here exhibit daily temperature rhythms that only differ in onset by a few  
321 hours, but the IDC schedule differs by 8 hours. Third, a combination of host rhythms may impact on the  
322 IDC schedule, including minor contributions from non-feeding rhythms. This may explain why the degree  
323 of synchronicity is slightly reduced in TRF wild type hosts compared to *ad lib* fed wild type hosts, and  
324 highest in TRF clock-disrupted mice: the separation of food-entrained and SCN-driven rhythms in TRF  
325 wild type hosts may result in conflicting time-cues, whereas the lack of TTFLs in all cells in the clock-  
326 disrupted mice may mean that only food-related time-cues are present.

327

328 We were also able to use our data to test whether parasite performance is enhanced in clock-disrupted  
329 hosts, due perhaps to lack of regulation/coordination of clock-controlled immune responses [29, 32].  
330 However, we find that the maximum parasite density is approximately 25 - 40% (across both  
331 experiments) lower in infections of clock disrupted compared to wild type hosts. Clock disruption might  
332 reduce the ability of hosts to process and metabolise food efficiently, making these hosts a poorer  
333 resource for parasites. For example, PER1 and PER2 have a regulatory role in the circadian control of  
334 heme synthesis, a primary resource for parasites [46] and loss of PER2 is implicated in making RBC more  
335 susceptible to oxidative stress, decreasing levels of ATP and shortening RBC lifespan [47]. Further, clock  
336 disruption affects host nutrition via an interplay with microbiota [48]. Parasite performance is linked to  
337 host nutrition because caloric restriction leads to reduced parasite densities [49]. However, if either  
338 clock disruption and/or our time-restricted-feeding regime caused caloric restriction we would expect

339 this to manifest as clock disrupted mice – especially in the TRF groups – as having the lowest weights or  
340 the greatest weight loss. In contrast, *Per1/2*-null TRF mice were the heaviest in experiment 1 and  
341 *Per1/2*-null *ad lib* mice lost the most weight in experiment 2 (ESM Table S3). Another, non-mutually  
342 exclusive, possibility is that the IDC becomes scheduled to coordinate with feeding rhythms faster in  
343 wild type mice due to facilitation by a host clock-controlled process and the faster parasites can  
344 reschedule, the lower the costs of being uncoordinated to the host rhythm. However, that parasite  
345 performance does not differ between infections remaining / becoming desynchronised versus  
346 synchronous within the same type of host (i.e. *Per1/2*-null) suggests either that there are no major costs  
347 to parasites of being desynchronised or that it is advantageous for them to match the degree of  
348 rhythmicity of their host. For example, a desynchronised IDC in arrhythmic hosts (*Per1/2*-null *ad lib* fed)  
349 may be the best strategy to avoid exploitation competition between parasites for arrhythmic resources.  
350 Whilst the costs of virulence, as measured by weight loss, do not appear to differ between wild type and  
351 clock-disrupted hosts, the findings for RBC loss are more complicated (and do not clearly mirror  
352 maximum parasite densities). No significant difference between feeding regimes or host genotypes were  
353 detected when infections were initiated with desynchronised parasites. But, in infections initiated with  
354 synchronous parasites, wild type hosts became the most anaemic and clock-disrupted hosts with a  
355 feeding rhythm lost the least RBC. Further work is needed to establish whether a loss of canonical clock  
356 regulation affects the ability of host to control or tolerate parasites.

357

#### 358 **CONCLUSION:**

359 The schedule (timing and synchrony) of the malaria parasite's IDC is not reliant on a functioning host  
360 canonical circadian clock. The speed with which the IDC schedule changes, its precision, and the modest  
361 loss of parasite number involved in rescheduling [13], suggest the parasite is actively aligning certain



362 developmental stages with host feeding rhythms to take advantage of periodicity in a resource(s). The  
363 precise cue(s) that parasites use to schedule the IDC is unknown but we propose it is directly related to  
364 feeding events, and not associated with the food-entrained peripheral TTFL in the organs or the central  
365 oscillator in the SCN. Our data also highlight a complex interplay between host rhythms, features of the  
366 IDC schedule, parasite fitness (as approximated by maximum density), and disease severity. Unravelling  
367 these complexities may reveal measures to minimize disease severity and improve recovery, whilst  
368 reducing parasite fitness.

369

370

371 **ETHICS:**

372 All procedures were carried out in accordance with the UK Animals (Scientific Procedures) Act 1986 (PPL  
373 70/8546).

374

375 **DATA ACCESSIBILITY:**

376 The datasets supporting the conclusions of this article are available in the Edinburgh DataShare  
377 repository, <https://doi.org/10.7488/ds/2622>

378

379 **FUNDING:**

380 This work was supported by the Wellcome Trust (202769/Z/16/Z; 204511/Z/16/Z), the Royal Society  
381 (UF110155; NF140517), and the Human Frontier Science Program (RGP0046/2013).

382

383 **COMPETING INTERESTS**

384 We declare no competing interests.

385

386 **AUTHOR'S CONTRIBUTIONS**

387 AOD and SER conceived the study, AOD and KP carried out the experiments, AOD analysed the data, and  
388 all authors wrote the manuscript.

389

390 **ACKNOWLEDGEMENTS:**

391 We thank Ronnie Mooney for technical assistance and Giles K.P. Bara for advice.

392

393

394 **REFERENCES:**

- 395 1. Martinez-Bakker M., Helm B. 2015 The influence of biological rhythms on host–parasite  
396 interactions. *Trends Ecol Evol* **30**(6), 314-326.
- 397 2. Reece S.E., Prior K.F., Mideo N. 2017 The Life and Times of Parasites: Rhythms in Strategies for  
398 Within-host Survival and Between-host Transmission. *J Biol Rhythms* **32**(6), 516-533.
- 399 3. Westwood M.L., O'Donnell A.J., de Bekker C., Lively C.M., Zuk M., Reece S.E. 2019 The  
400 evolutionary ecology of circadian rhythms in infection. *Nature ecology & evolution*, 1.
- 401 4. Hevia M.A., Canessa P., Müller-Esparza H., Larrondo L.F. 2015 A circadian oscillator in the fungus  
402 *Botrytis cinerea* regulates virulence when infecting *Arabidopsis thaliana*. *Proceedings of the National*  
403 *Academy of Sciences* **112**(28), 8744-8749.
- 404 5. Roden L.C., Ingle R.A. 2009 Lights, rhythms, infection: the role of light and the circadian clock in  
405 determining the outcome of plant–pathogen interactions. *The Plant Cell* **21**(9), 2546-2552.
- 406 6. Kiessling S., Dubeau-Laramée G., Ohm H., Labrecque N., Olivier M., Cermakian N. 2017 The  
407 circadian clock in immune cells controls the magnitude of *Leishmania* parasite infection. *Scientific*  
408 *reports* **7**(1), 10892.
- 409 7. Edgar R.S., Stangherlin A., Nagy A.D., Nicoll M.P., Efstathiou S., O'Neill J.S., Reddy A.B. 2016 Cell  
410 autonomous regulation of herpes and influenza virus infection by the circadian clock. *Proceedings of the*  
411 *National Academy of Sciences* **113**(36), 10085-10090.

- 412 8. Zhuang X., Magri A., Hill M., Lai A.G., Kumar A., Rambhatla S.B., Donald C.L., Lopez-Clavijo A.F.,  
413 Rudge S., Pinnick K. 2019 The circadian clock components BMAL1 and REV-ERB $\alpha$  regulate flavivirus  
414 replication. *Nature communications* **10**(1), 377.
- 415 9. Rijo-Ferreira F., Pinto-Neves D., Barbosa-Morais N.L., Takahashi J.S., Figueiredo L.M. 2017  
416 *Trypanosoma brucei* metabolism is under circadian control. *Nature microbiology* **2**(6), 17032.
- 417 10. Hirako I.C., Assis P.A., Hojo-Souza N.S., Reed G., Nakaya H., Golenbock D.T., Coimbra R.S.,  
418 Gazzinelli R.T. 2018 Daily Rhythms of TNF $\alpha$  Expression and Food Intake Regulate Synchrony of  
419 Plasmodium Stages with the Host Circadian Cycle. *Cell Host Microbe* **23**(6), 796-808 e796.  
420 (doi:10.1016/j.chom.2018.04.016).
- 421 11. Prior K.F., van der Veen D.R., O'Donnell A.J., Cumnock K., Schneider D., Pain A., Subudhi A.,  
422 Ramaprasad A., Rund S.S.C., Savill N.J., et al. 2018 Timing of host feeding drives rhythms in parasite  
423 replication. *PLoS Pathog* **14**(2).
- 424 12. O'Donnell A.J., Mideo N., Reece S.E. 2014 Erratum to: disrupting rhythms in *Plasmodium*  
425 *chabaudi*: costs accrue quickly and independently of how infections are initiated. *Malar J* **13**(1), 503.
- 426 13. O'Donnell A.J., Mideo N., Reece S.E. 2013 Disrupting rhythms in *Plasmodium chabaudi*: costs  
427 accrue quickly and independently of how infections are initiated. *Malar J* **12**, 372. (doi:10.1186/1475-  
428 2875-12-372).
- 429 14. O'Donnell A.J., Schneider P., McWatters H.G., Reece S.E. 2011 Fitness costs of disrupting  
430 circadian rhythms in malaria parasites. *Proc Biol Sci* **278**(1717), 2429-2436.  
431 (doi:10.1098/rspb.2010.2457).
- 432 15. Pigeault R., Caudron Q., Nicot A., Rivero A., Gandon S. 2018 Timing malaria transmission with  
433 mosquito fluctuations. *Evolution Letters*.
- 434 16. Schneider P., Rund S.S.C., Smith N.L., Prior K.F., O'Donnell A.J., Reece S.E. 2018 Adaptive  
435 periodicity in the infectivity of malaria gametocytes to mosquitoes. *Proc Biol Sci* **285**(1888).  
436 (doi:10.1098/rspb.2018.1876).
- 437 17. Cooke M.K., Kahindi S.C., Oriango R.M., Owaga C., Ayoma E., Mabuka D., Nyangau D., Abel L.,  
438 Atieno E., Awuor S., et al. 2015 'A bite before bed': exposure to malaria vectors outside the times of net  
439 use in the highlands of western Kenya. *Malar J* **14**. (doi:10.1186/S12936-015-0766-4).
- 440 18. Sougoufara S., Diedhiou S.M., Doucoure S., Diagne N., Sembene P.M., Harry M., Trape J.F.,  
441 Sokhna C., Ndiath M.O. 2014 Biting by *Anopheles funestus* in broad daylight after use of long-lasting  
442 insecticidal nets: a new challenge to malaria elimination. *Malar J* **13**. (doi:10.1186/1475-2875-13-125).

- 443 19. Wamae P.M., Githeko A.K., Otieno G.O., Kabiru E.W., Duombia S.O. 2015 Early biting of the  
444 *Anopheles gambiae* s.s. and its challenges to vector control using insecticide treated nets in western  
445 Kenya highlands. *Acta Trop* **150**, 136-142. (doi:10.1016/j.actatropica.2015.07.008).
- 446 20. Cambie G., Caillard V., Beaute-Lafitte A., Ginsburg H., Chabaud A., Landau I. 1991 Chronotherapy  
447 of malaria: identification of drug-sensitive stage of parasite and timing of drug delivery for improved  
448 therapy. *Ann Parasitol Hum Comp* **66**(1), 14-21.
- 449 21. Cheng Q., Kyle D.E., Gatton M.L. 2012 Artemisinin resistance in *Plasmodium falciparum*: A  
450 process linked to dormancy? *International journal for parasitology: drugs and drug resistance* **2**, 249-  
451 255.
- 452 22. Mideo N., Reece S.E., Smith A.L., Metcalf C.J. 2013 The Cinderella syndrome: why do malaria-  
453 infected cells burst at midnight? *Trends Parasitol* **29**(1), 10-16. (doi:10.1016/j.pt.2012.10.006).
- 454 23. Rouzine I.M., McKenzie F.E. 2003 Link between immune response and parasite synchronization  
455 in malaria. *Proc Natl Acad Sci U S A* **100**(6), 3473-3478.
- 456 24. Reece S.E., Prior K.F. 2018 Malaria Makes the Most of Mealtimes. *Cell Host Microbe* **23**(6), 695-  
457 697.
- 458 25. Ripperger J.A., Jud C., Albrecht U. 2011 The daily rhythm of mice. *FEBS Lett* **585**(10), 1384-1392.  
459 (doi:10.1016/j.febslet.2011.02.027).
- 460 26. Lamia K.A., Storch K.F., Weitz C.J. 2008 Physiological significance of a peripheral tissue circadian  
461 clock. *Proc Natl Acad Sci U S A* **105**(39), 15172-15177. (doi:10.1073/pnas.0806717105).
- 462 27. Turek F.W., Joshu C., Kohsaka A., Lin E., Ivanova G., McDearmon E., Laposky A., Losee-Olson S.,  
463 Easton A., Jensen D.R., et al. 2005 Obesity and metabolic syndrome in circadian Clock mutant mice.  
464 *Science* **308**(5724), 1043-1045. (doi:10.1126/science.1108750).
- 465 28. Hotta C.T., Gazarini M.L., Beraldo F.H., Varotti F.P., Lopes C., Markus R.P., Pozzan T., Garcia C.R.  
466 2000 Calcium-dependent modulation by melatonin of the circadian rhythm in malarial parasites. *Nat Cell*  
467 *Biol* **2**(7), 466-468. (doi:10.1038/35017112).
- 468 29. Scheiermann C., Kunisaki Y., Frenette P.S. 2013 Circadian control of the immune system. *Nat Rev*  
469 *Immunol* **13**(3), 190-198. (doi:10.1038/nri3386).
- 470 30. He W., Holtkamp S., Hergenhan S.M., Kraus K., de Juan A., Weber J., Bradfield P., Grenier J.M.P.,  
471 Pelletier J., Druzd D., et al. 2018 Circadian Expression of Migratory Factors Establishes Lineage-Specific  
472 Signatures that Guide the Homing of Leukocyte Subsets to Tissues. *Immunity* **49**(6), 1175-1190 e1177.  
473 (doi:10.1016/j.immuni.2018.10.007).

- 474 31. Allen N.C., Philip N.H., Hui L., Zhou X., Franklin R.A., Kong Y., Medzhitov R. 2019  
475 Desynchronization of the molecular clock contributes to the heterogeneity of the inflammatory  
476 response. *Sci Signal* **12**(571). (doi:10.1126/scisignal.aau1851).
- 477 32. Arjona A., Sarkar D.K. 2005 Circadian oscillations of clock genes, cytolytic factors, and cytokines  
478 in rat NK cells. *J Immunol* **174**(12), 7618-7624. (doi:174/12/7618 [pii]).
- 479 33. Bae K., Jin X., Maywood E.S., Hastings M.H., Reppert S.M., Weaver D.R. 2001 Differential  
480 functions of mPer1, mPer2, and mPer3 in the SCN circadian clock. *Neuron* **30**(2), 525-536.
- 481 34. Maywood E., Chesham J., Smyllie N., Hastings M. 2014 The Tau mutation of casein kinase 1 $\alpha$  sets  
482 the period of the mammalian pacemaker via regulation of Period1 or Period2 clock proteins. *J Biol*  
483 *Rhythms* **29**(2), 110-118.
- 484 35. Greischar M.A., Reece S.E., Savill N.J., Mideo N. 2019 The Challenge of Quantifying Synchrony in  
485 Malaria Parasites. *Trends Parasitol.*
- 486 36. Qian J., Scheer F.A. 2016 Circadian system and glucose metabolism: implications for physiology  
487 and disease. *Trends in Endocrinology & Metabolism* **27**(5), 282-293.
- 488 37. Babbitt S.E., Altenhofen L., Cobbold S.A., Istvan E.S., Fennell C., Doerig C., Llinás M., Goldberg  
489 D.E. 2012 Plasmodium falciparum responds to amino acid starvation by entering into a hibernatory  
490 state. *Proceedings of the National Academy of Sciences* **109**(47), E3278-E3287.
- 491 38. Brancucci N.M., Gerdt J.P., Wang C., De Niz M., Philip N., Adapa S.R., Zhang M., Hitz E.,  
492 Niederwieser I., Boltryk S.D. 2017 Lysophosphatidylcholine regulates sexual stage differentiation in the  
493 human malaria parasite *Plasmodium falciparum*. *Cell* **171**(7), 1532-1544. e1515.
- 494 39. Adamovich Y., Rousso-Noori L., Zwihaft Z., Neufeld-Cohen A., Golik M., Kraut-Cohen J., Wang  
495 M., Han X., Asher G. 2014 Circadian clocks and feeding time regulate the oscillations and levels of  
496 hepatic triglycerides. *Cell Metab* **19**(2), 319-330. (doi:10.1016/j.cmet.2013.12.016).
- 497 40. Takasu N.N., Kurosawa G., Tokuda I.T., Mochizuki A., Todo T., Nakamura W. 2012 Circadian  
498 regulation of food-anticipatory activity in molecular clock-deficient mice. *PLoS One* **7**(11), e48892.  
499 (doi:10.1371/journal.pone.0048892).
- 500 41. Hoyle N.P., O'Neill J.S. 2015 Oxidation-reduction cycles of peroxiredoxin proteins and  
501 nontranscriptional aspects of timekeeping. *Biochemistry* **54**(2), 184-193. (doi:10.1021/bi5008386).
- 502 42. Edgar R.S., Green E.W., Zhao Y., van Ooijen G., Olmedo M., Qin X., Xu Y., Pan M., Valekunja U.K.,  
503 Feeney K.A. 2012 Peroxiredoxins are conserved markers of circadian rhythms. *Nature* **485**(7399), 459.

- 504 43. Feeney K.A., Hansen L.L., Putker M., Olivares-Yañez C., Day J., Eades L.J., Larrondo L.F., Hoyle  
505 N.P., O'Neill J.S., van Ooijen G. 2016 Daily magnesium fluxes regulate cellular timekeeping and energy  
506 balance. *Nature* **532**(7599), 375.
- 507 44. Blanford J.I., Blanford S., Crane R.G., Mann M.E., Paaajmans K.P., Schreiber K.V., Thomas M.B.  
508 2013 Implications of temperature variation for malaria parasite development across Africa. *Scientific*  
509 *reports* **3**, 1300. (doi:10.1038/srep01300).
- 510 45. Chao J., Ball G.H. 1962 The effect of low temperature on *Plasmodium relictum* in *Culex tarsalis*. *J*  
511 *Parasitol* **48**, 252-254.
- 512 46. Zheng B., Albrecht U., Kaasik K., Sage M., Lu W., Vaishnav S., Li Q., Sun Z.S., Eichele G., Bradley  
513 A., et al. 2001 Nonredundant roles of the *mPer1* and *mPer2* genes in the mammalian circadian clock. *Cell*  
514 **105**(5), 683-694.
- 515 47. Sun Q., Zhao Y., Yang Y., Yang X., Li M., Xu X., Wen D., Wang J., Zhang J. 2017 Loss of the clock  
516 protein PER2 shortens the erythrocyte life span in mice. *J Biol Chem* **292**(30), 12679-12690.  
517 (doi:10.1074/jbc.M117.783985).
- 518 48. Asher G., Sassone-Corsi P. 2015 Time for food: the intimate interplay between nutrition,  
519 metabolism, and the circadian clock. *Cell* **161**(1), 84-92. (doi:10.1016/j.cell.2015.03.015).
- 520 49. Mancio-Silva L., Slavic K., Grilo Ruivo M.T., Grosso A.R., Modrzynska K.K., Vera I.M., Sales-Dias J.,  
521 Gomes A.R., MacPherson C.R., Crozet P., et al. 2017 Nutrient sensing modulates malaria parasite  
522 virulence. *Nature* **547**(7662), 213-216. (doi:10.1038/nature23009).

523

524

## 525 **FIGURE LEGENDS:**

### 526 **Figure 1**

527 **Experimental designs and predictions.** Donor infections from mice housed in light:dark and/or  
528 dark:light were used to generate a desynchronised (a; ring stage + trophozoite stage parasites) and  
529 synchronous (b; ring stage parasites only) inocula for initiating experimental infections. Wild type (WT)  
530 or *Per1/2*-null clock-disrupted mice were given constant access to food (*ad lib*) or fed on a Time  
531 Restricted Feeding (TRF) schedule in which food access was restricted to only 10h per day. These mice

532 were used as hosts for experimental infections and sampled every 4h for 32h on Day 5 and 6 post  
533 infection. We predicted that desynchronised infections will become synchronous in mice in which  
534 feeding is rhythmic (both WT groups and *Per1/2*-null TRF) but will remain desynchronised in the *ad lib*  
535 fed *Per1/2*-null mice due to a lack feeding rhythms (a). For infections initiated with synchronous  
536 parasites, we predicted that parasites will maintain synchrony in WT and *Per1/2*-null TRF groups and  
537 that their schedule becomes matched to the timing of host feeding, but that parasites will lose  
538 synchrony in *ad lib* fed *Per1/2*-null that lack feeding rhythms (b).

539

## 540 **Figure 2**

### 541 **The IDC of initially desynchronised parasites becomes coordinated to host feeding rhythms.**

542 Population cosinor model fits and data points from each individual infection (a). Amplitude (b) and  
543 phase in hours (GMT) (c) were calculated from cosinor model fits from each individual mouse (lighter  
544 points) and then summarised as a mean  $\pm$ SEM, points with error bars in (b), and circular mean  $\pm$ SD point  
545 with dashed line and shading in (c). For amplitude (b), effect sizes relative to the 'WT *ad lib*' group are  
546 plotted on the lower axes as a bootstrap sampling distribution (mean difference  $\pm$  95% CI depicted as a  
547 point with error bars). For all parts, infections in Wild Type (WT) hosts are coloured orange and blue,  
548 and infections in *Per1/2*-null mice are coloured green and purple. TRF indicates 'Time Restricted  
549 Feeding' with food only available for 10 hours each day (feeding period indicated above x axis in (a)).  
550 Grey shading in (c) represents active (dark shading; 19:00-07:00) and rest (light shading; 07:00-19:00)  
551 periods relative to wild type mice in DD.

552

## 553 **Figure 3**

554 **The IDC loses synchrony in hosts without feeding rhythms.** Population cosinor model fits and data  
555 points from each individual infection (a). Amplitude (b) and phase in hours (GMT) were calculated from  
556 cosinor model fits from each individual mouse (lighter points) and then summarised as a mean  $\pm$ SEM,  
557 points with error bars in (b), and circular mean  $\pm$ SD point with dashed line and shading in (c). For  
558 amplitude (b), effect sizes relative to 'WT TRF' group are plotted on the lower axes as a bootstrap  
559 sampling distribution (mean difference  $\pm$  95% CI depicted as a point with error bars). For all parts,  
560 infections in Wild Type (WT) are coloured grey, and infections in *Per1/2*-null mice are coloured orange  
561 and blue. TRF indicates 'Time Restricted Feeding' with food only available for 10 hours each day (feeding  
562 period indicated above x axis in (a)). Grey shading in (c) represents active (dark shading; 19:00-07:00)  
563 and sleep (light shading; 07:00-19:00) periods relative to wild type mice in DD.



(a)

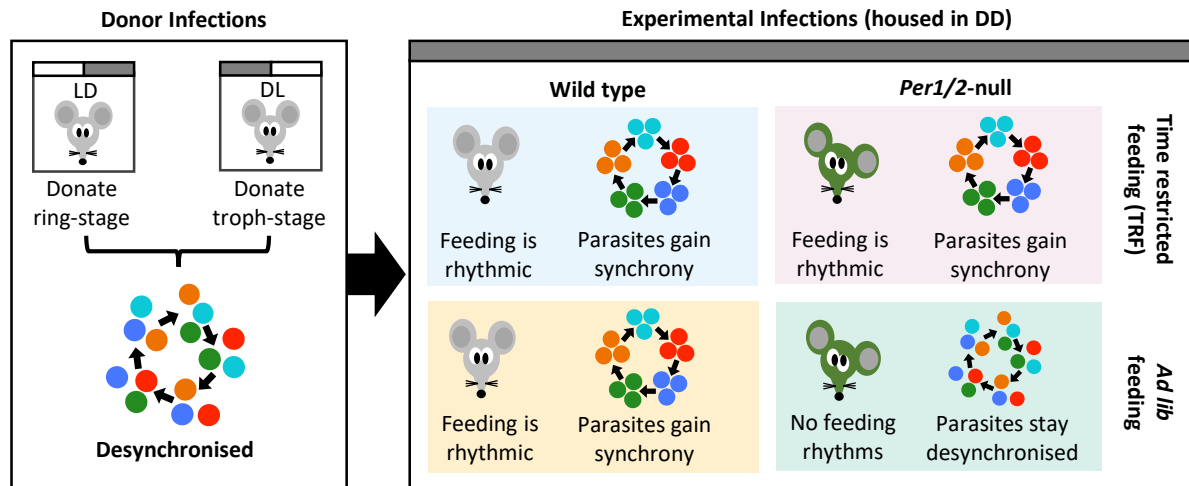

(b)

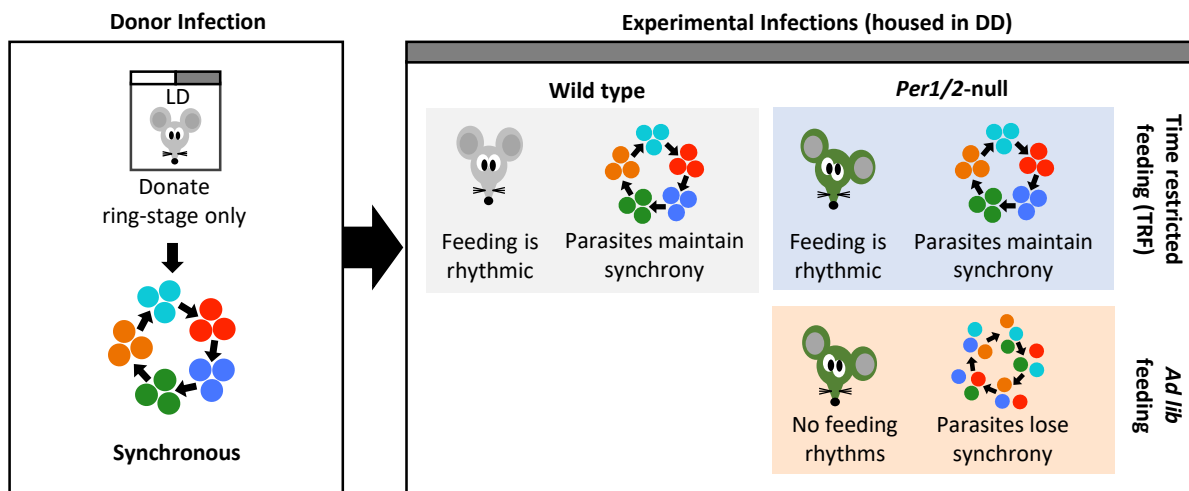

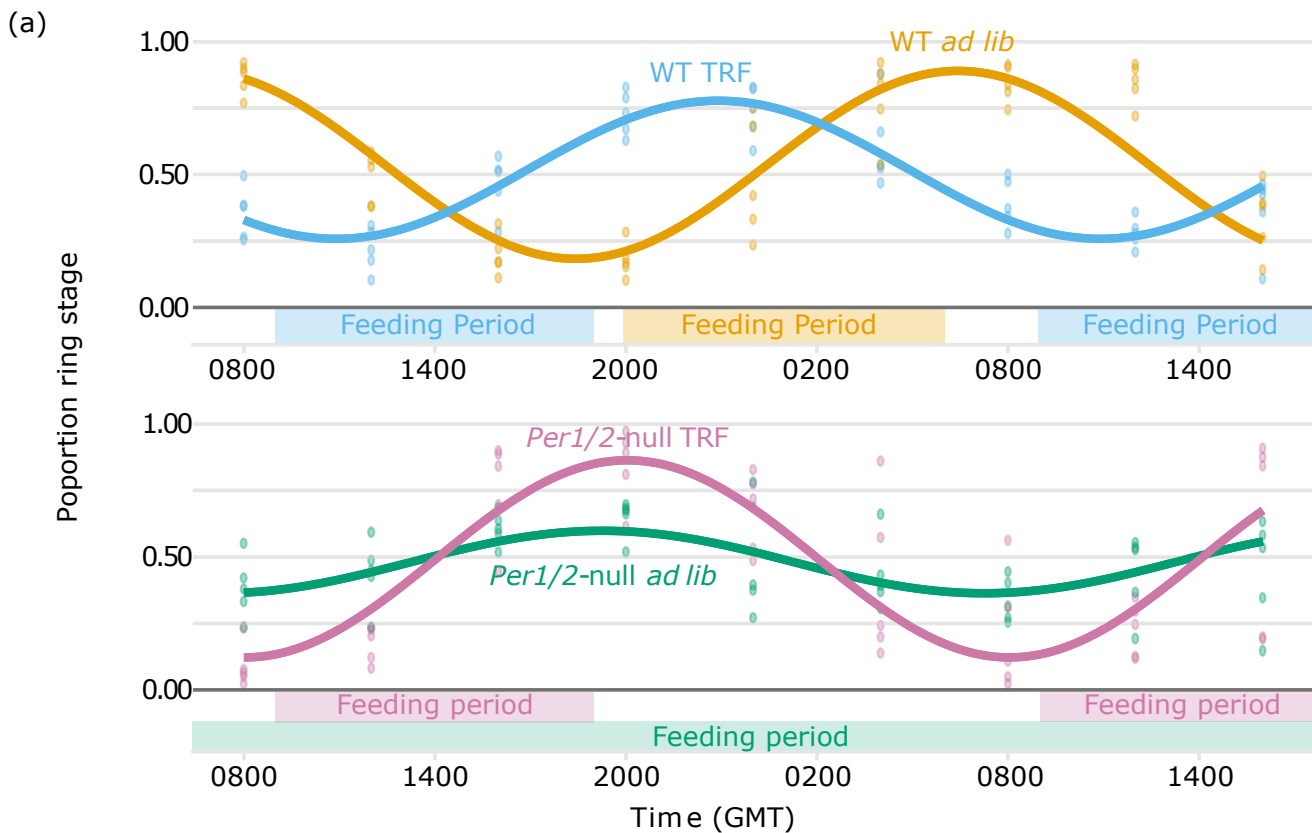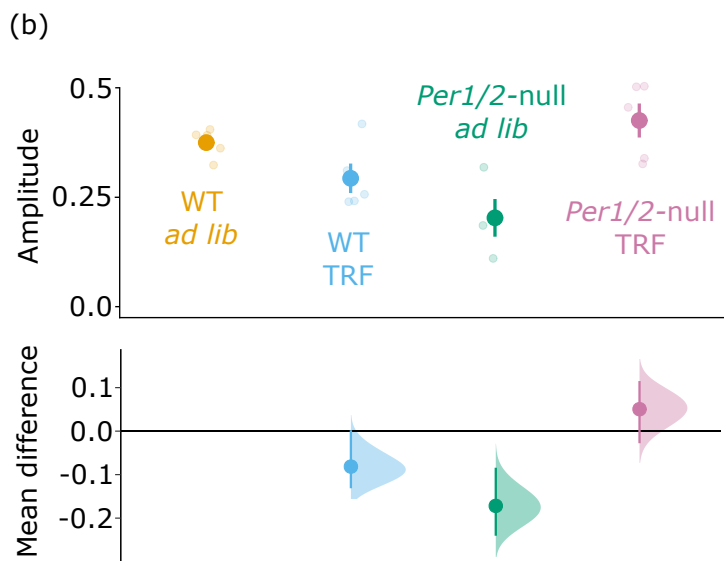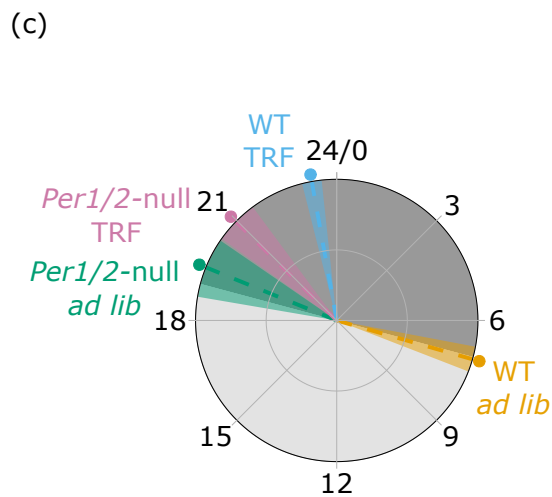

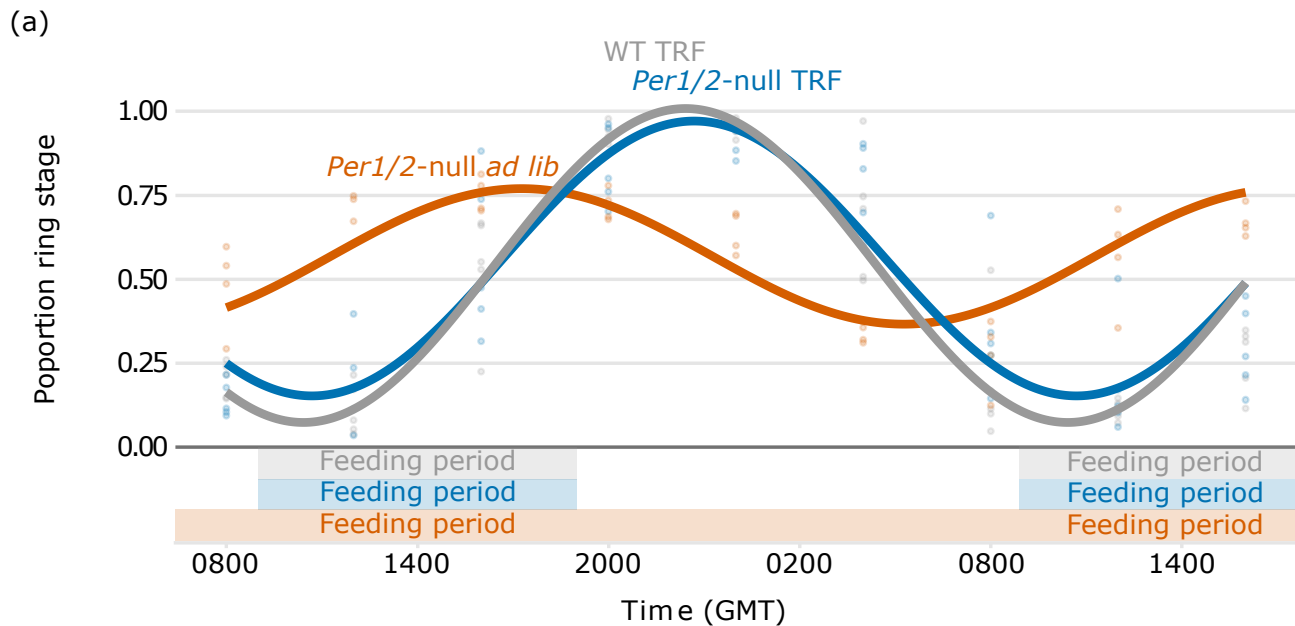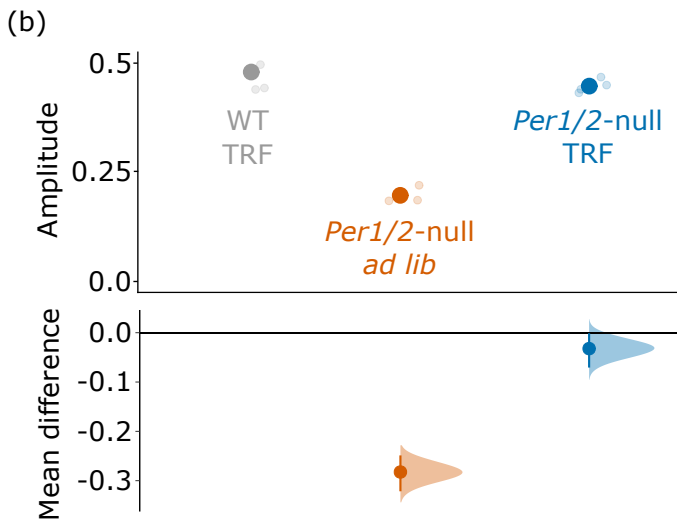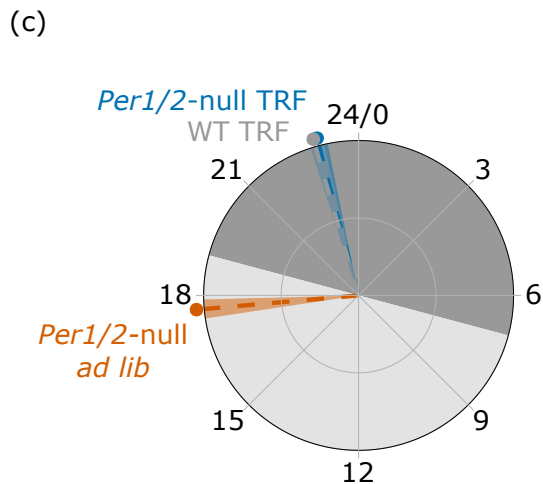

Source: https://www.biorxiv.org/content/10.1101/777011v2.full.pdf
